1 **An affinity-matured human monoclonal antibody targeting fusion loop epitope of**  
2 **dengue virus with *in vivo* therapeutic potency**

3

4 Tomohiro Kotaki<sup>a,b\*</sup>, Takeshi Kurosu<sup>c</sup>, Ariadna Grinyo<sup>d</sup>, Edgar Davidson<sup>d</sup>, Siti Churrotin<sup>b</sup>,

5 Tamaki Okabayashi<sup>e</sup>, Orapim Puiprom<sup>e</sup>, Kris Cahyo Mulyatno<sup>b</sup>, Teguh Hari Sucipto<sup>b</sup>,

6 Benjamin J. Doranz<sup>d</sup>, Ken-ichiro Ono<sup>f</sup>, Soegeng Soegijanto<sup>b</sup>, Masanori Kameoka<sup>a\*</sup>

7

8 <sup>a</sup>Department of Public Health, Kobe University Graduate School of Health Sciences, Japan

9 <sup>b</sup>Collaborative Research Center for Emerging and Re-emerging Infectious Diseases, Institute  
10 of Tropical Disease, Airlangga University, Indonesia

11 <sup>c</sup>Department of Virology I, National Institute of Infectious Diseases (NIID), Japan

12 <sup>d</sup>Integral Molecular, Inc., PA, USA

13 <sup>e</sup>Mahidol-Osaka Center for Infectious Diseases (MOCID), Faculty of Tropical Medicine,  
14 Mahidol University, Thailand

15 <sup>f</sup>Medical & Biological Laboratories Corporation, Ltd., Japan

16

17 \*Corresponding authors:

18 Department of Public Health, Kobe University Graduate School of Health Sciences, Japan.

19 Tomohiro Kotaki ([tkotaki@people.kobe-u.ac.jp](mailto:tkotaki@people.kobe-u.ac.jp))

20 Masanori Kameoka ([mkameoka@port.kobe-u.ac.jp](mailto:mkameoka@port.kobe-u.ac.jp))

21

22 Running title: A potent human monoclonal antibody against dengue virus

23

24 Key words: Dengue, Human monoclonal antibody, neutralization, antibody-dependent

25 enhancement, Fc-receptor

26

27 **Abstract**

28           Dengue virus (DENV), from the genus *flavivirus* of the family *flaviviridae*, causes  
29 serious health problems globally. Human monoclonal antibodies (HuMAb) can be used to  
30 elucidate the mechanisms of neutralization and antibody-dependent enhancement (ADE) of  
31 DENV infections, leading to the development of a vaccine or therapeutic antibodies. Here, we  
32 generated eight HuMAb clones from an Indonesian patient infected with DENV. These  
33 HuMAbs exhibited the typical characteristics of weak neutralizing antibodies including high  
34 cross-reactivity with other flaviviruses and targeting of the fusion loop epitope (FLE). However,  
35 one of the HuMAbs, 3G9, exhibited strong neutralization ability ( $NT_{50} < 0.1 \mu\text{g/ml}$ ) and  
36 possessed a high somatic hyper-mutation rate of the variable region, indicating affinity-  
37 maturation. Administration of this antibody significantly improved the survival rate of  
38 interferon- $\alpha/\beta/\gamma$  receptor knockout C57BL/6 mice after a lethal DENV challenge. Additionally,  
39 Fc-modified 3G9 molecules that had lost their *in vitro* ADE activity showed significantly  
40 enhanced therapeutic potency *in vivo* and competed strongly with an ADE-prone antibody *in*  
41 *vitro*. Taken together, the affinity-matured FLE-targeting antibody 3G9 exhibits several  
42 promising features for therapeutic application including a low  $NT_{50}$  value, potential for pan-  
43 flavivirus infection treatment, and suppression of ADE. This study demonstrates the therapeutic  
44 potency of affinity-matured FLE-targeting antibodies.

## 45 **Introduction**

46 Many clinically-important mosquito-borne viruses including dengue virus (DENV),  
47 Japanese encephalitis virus (JEV), West Nile virus (WNV), and Zika virus (ZIKV) belong to  
48 the genus *flavivirus* of the family *flaviviridae* [1]. Of these, DENV causes the most serious  
49 health problems world-wide, in terms of the number of patients and fatalities. Infection with  
50 any of four serotypes of dengue virus (DENV-1 to DENV-4) causes dengue fever and dengue  
51 hemorrhagic fever [2], or dengue and severe dengue, as classified by the World Health  
52 Organization [3]. An estimated 390 million cases of DENV infection occur annually world-  
53 wide [4]. Of these, 100 million people develop symptomatic dengue and 21,000 die [4,5].

54 One of the mechanisms hypothesized to cause a higher risk of severe dengue is the  
55 antibody dependent enhancement (ADE) of the infection, whereby pre-existing anti-DENV  
56 antibodies induced by the primary infection or vaccination facilitate subsequent DENV  
57 infections of Fc receptor-positive cells like macrophages [6]. Thus, DENV antibodies exhibit  
58 two conflicting activities: neutralization and ADE. Neutralization suppresses viremia, resulting  
59 in protection against DENV infection, while ADE increases viremia, and this is associated with  
60 severe dengue [7]. This phenomenon may increase the risk of developing severe dengue disease  
61 among seronegative people who have received vaccinations of CYD-TDV, which is the only  
62 licensed dengue vaccine [8,9]. In addition, antibodies induced by ZIKV infection are reported  
63 to enhance DENV infections by ADE *in vitro*, and *vice versa* [10,11]. ADE complicates dengue

64 pathogenesis, and, thus, forms an obstacle to developing a fully effective dengue vaccine and  
65 prophylactic or therapeutic antibodies.

66 The DENV genome encodes three structural proteins (capsid [C],  
67 premembrane/membrane [prM/M], and envelope [E]) and seven non-structural proteins [1].  
68 The viral particle is assembled in the lumen of the endoplasmic reticulum, where  
69 nucleocapsid (viral RNA complexed with the C protein) is incorporated into the lipid bilayer  
70 containing prM and E proteins [1]. As this immature viral particle traffics through the trans-  
71 Golgi network, a host serine protease (furin) cleaves the prM protein from the immature virus,  
72 resulting in maturation (the ability to infect). This maturation step occasionally remains  
73 incomplete, resulting in a mixture of virus particles at different states of maturity [12,13].  
74 Virus particles exhibit conformational dynamics referred to viral ‘breathing’ [14]. The  
75 maturity and breathing of virions have an impact on the recognition of antibodies and,  
76 thereby, affect their neutralizing and enhancing activities [15,16].

77 The E protein is the major target of neutralizing antibodies, since it is located on the  
78 surface of a DENV virion [17]. Three domains (domains I, II, and III; DI, DII and DIII) have  
79 been identified in the E protein structure [18]. Each DENV particle contains 180 monomers of  
80 E protein that form 90 E-dimers [19].

81 The neutralization and ADE activities of antibodies are determined by the epitope of  
82 the virus [20,21]. Antibodies targeting the fusion loop epitope (FLE) or bc loop on DII

83 generally exhibit low levels of neutralization, high ADE, and high cross-reactivity to  
84 flaviviruses. These antibodies are extensively induced during secondary DENV infections,  
85 because the epitopes are highly conserved among the flaviviruses [22,23]. Antibodies that  
86 bind to E-dimers, quaternary-structure epitopes, or the hinge regions of DI-DII exhibit strong  
87 neutralization ability by blocking viral conformational changes and membrane fusion [24-26].  
88 Indeed, antibodies that recognize complex epitopes account for much of the virus neutralizing  
89 activity that occurs in the serum of convalescing patients [24,25,27]. However, many of these  
90 antibodies are serotype-specific. Antibodies that target domain III are serotype-specific and  
91 show higher neutralizing activity than those targeting domains I-II, although domain III-  
92 targeting antibodies are not predominantly produced in humans [25,27,28].

93 Human monoclonal antibodies (HuMAbs) could be useful tools for elucidating the  
94 mechanisms of neutralization and ADE, information that is required for vaccine development.  
95 In addition, HuMAbs can be used for prophylactic or therapeutic purposes. Several groups have  
96 been successful in generating HuMAbs against DENV, using various methods [24-26, 29]. Here,  
97 using newly developed SPYMEG cell technology, we generated eight anti-DENV HuMAb  
98 clones from an Indonesian patient with dengue [30,31].

## 99 **Results**

### 100 *Hybridoma preparation and details of HuMAbs*

101 We established eight HuMAb clones from a blood specimen of an Indonesian patient  
102 with dengue using SPYMEG cells that belong to a human hybridoma fusion partner cell line  
103 [30,31]. The patient was diagnosed with acute dengue fever (2 days after onset); the blood  
104 specimen was found to be anti-DENV IgM/IgG- and NS1-positive, indicating a secondary  
105 infection. The DENV serotype could not be determined by RT-PCR, using RNA extracted  
106 from the patient serum [32]. All HuMAbs were of the IgG1 subtype.

107

### 108 *Neutralization activity*

109 All HuMAbs exhibited neutralizing activity against all four serotypes of DENV  
110 prototype strains and Indonesian isolates (Table 1, Fig.1A). DENV-2, in particular, was  
111 strongly neutralized; the NT<sub>50</sub> was lower than 0.1 µg/ml. All of the HuMAbs also neutralized  
112 JEV. Overall, HuMAbs 1F11 and 3G9 showed stronger neutralizing activity. Thus, these two  
113 promising HuMAbs were subjected to neutralization tests using single-round infectious  
114 particles (SRIPs) containing prM-E proteins of ZIKV and WNV, due to the unavailability of  
115 the infectious viruses [33,34]. Again, 1F11 and 3G9 neutralized ZIKV and WNV particles as  
116 efficiently as DENV (Fig. 1B). These data indicated that these HuMAbs were pan-flavivirus  
117 broadly-neutralizing antibodies.

118

119 ***Stage of HuMAb neutralization***

120           Flavivirus infections can be neutralized by several mechanisms including the  
121 inhibition of receptor binding, inhibition of membrane fusion, and aggregation of virion  
122 particles [35]. A time of addition assay, using Vero cells and the DENV-2 New Guinea C  
123 (NGC) strain, was conducted to determine the neutralization mechanism used by the HuMAb  
124 clones [36]. The antibodies all neutralized DENV-2 during the pre-adsorption assay but not  
125 the post-adsorption assay (Table 2). This suggested that our HuMAbs blocked pre-adsorption  
126 steps including viral adsorption but not post-adsorption steps such as viral membrane fusion  
127 or conformation change.

128

129 ***Epitope mapping***

130           The epitope target of an antibody influences its neutralization potency and  
131 mechanism. Therefore, epitope mapping was conducted using HEK293 cells transfected with  
132 a DENV2 prM-E mutant library, which possess a single alanine substitution at each residue of  
133 prM-E (661 mutants in total) [37]. Four antibodies (1C3, 1F11, 3E1, and 3G9) were tested  
134 against all the mutants, while the other four antibodies (1C5, 1E5, 2C2, and 2G2) were tested  
135 only against selected mutants with an FLE mutation, because of the availability of materials.  
136 The data are shown in Supplementary Fig. S1. The critical residues that abolished the binding



137 ability of the HuMAbs tested are presented in Fig. 2 and Table 3. The W101A mutation was  
138 critical to the activity of all eight HuMAbs. In addition to W101A, L107A and/or F108A were  
139 responsible for binding. All of the critical residues were located on the fusion loop of the E  
140 protein, which is highly conserved among the flaviviruses. These data substantiated the  
141 breadth of neutralizing ability exhibited by the HuMAbs considered in this study. Our  
142 antibodies were typical FLE antibodies, which are dominantly produced when a secondary  
143 dengue-associated infection occurs.

144         The generation of escape mutants was attempted to further investigate the epitope, by  
145 passaging DENV-2 in the presence of the HuMAbs in Vero cells and then sequencing the E  
146 protein gene in any surviving viruses. However, we did not identify any mutations in the E  
147 protein of surviving viruses.

148

#### 149 ***ADE activity***

150         Targeting of the FLE is typical of weak-neutralizing and high-ADE antibodies  
151 [22,23]. We measured ADE activity using semi-adherent K562 cells [38]. Although the  
152 HuMAb clones exhibited strong neutralizing activity in Vero cells, strong ADE activity was  
153 observed in our assay system (Fig. 3). DENV-2 was neutralized at high concentrations of the  
154 HuMAb clones, while the other strains, DENV-1, -3, and -4, were not neutralized. These data  
155 suggested that the cloned HuMAbs could contribute to disease enhancing activity.

156

157 ***Recombinant IgG construction and evaluation***

158           Although the cloned antibodies were potent in terms of low NT<sub>50</sub> in Vero cells, high  
159 ADE was observed in K562 cells. However, these antibodies could potentially be used in  
160 therapeutic applications, by modifying the effector function and disrupting the ADE activity.  
161 Thus, one of three mutations [L234A + L235A (LALA), D265A, and N297A] was introduced  
162 to the Fc region of the best neutralizing HuMAb, 3G9, to disrupt the interaction with Fc  
163 receptors [39]. We chose to test three mutations, because the effect of Fc-modification during  
164 the *in vivo* animal experiment varied depending on the study group [40-45]. These three  
165 mutations are described as being the same in terms of the effect on loss of binding to Fc  
166 receptors and should not compromise antibody neutralizing potency [46] or shorten the half-  
167 life significantly [47]. However, N297A abolishes N-linked glycosylation at N-297, while the  
168 LALA and D265A mutants would be fully glycosylated. Additionally, LALA and N297A  
169 reduce complement component 1q (C1q) binding, whereas D265A does not compromise  
170 complement-dependent cytotoxicity (CDC), which is related to virus clearance [20,39]. The  
171 difference in the mutations may cause subtle changes in the IgG phenotype, resulting in  
172 differences in *in vivo* efficacy [47].

173           3G9 was chosen to make recombinant antibodies, because it showed higher  
174 neutralizing activity and *in vivo* protection (see below). The recombinant Fc-modified 3G9

175 antibodies neutralized DENV-2 at comparable level to that of the 3G9-original in Vero cells  
176 (Table 4, Fig. 4A). As expected, the recombinant 3G9 antibodies did not show ADE activity in  
177 K562 cells, even at a sub-neutralizing concentration (Fig. 4B).

178

### 179 ***HuMAb protection in vivo***

180 Because the neutralization and ADE activities *in vitro* did not always correlate with  
181 protection *in vivo*, we tested the ability of antibodies to protect against DENV infection in an  
182 animal model. We tested the ability of 3G9, 1F11 (another potent HuMAb), and Fc-modified  
183 3G9 to protect interferon- $\alpha/\beta/\gamma$  receptor knockout (IFN- $\alpha/\beta/\gamma$ R KO) C57BL/6 mice  
184 challenged with DENV-3 [48]. DENV-3 was chosen because of the availability of the lethal  
185 infection mouse model, in which DENV infection causes vascular leakage without showing  
186 neurologic disorder [48]. Antibodies were injected intraperitoneally (i.p.) after one day of  
187 virus challenge. Mice administered with an isotype control IgG died within 4 days  
188 postinfection (Fig. 5). 1F11 exhibited almost no protection, while the original unmodified  
189 3G9 significantly prolonged survival, although all mice died within 20 days post-infection ( $p$   
190  $< 0.01$ ). All three recombinant 3G9 antibodies significantly enhanced the survival rate when  
191 compared with the original 3G9 ( $p < 0.05$ ). There were no significant differences among the  
192 three recombinant antibodies ( $p > 0.05$ ). These results indicated that the reduced ADE shown  
193 by these modified antibodies promotes their effectiveness *in vivo* and suggests that

194 recombinant 3G9 antibodies are promising therapeutic agents.

195

196 ***Competition assay using ELISA and ADE assays***

197 Our animal experiment was carried out without ADE in the post-infection treatment

198 model. Thus, it remained unclear whether the Fc-modified 3G9 could suppress ADE *in vivo*.

199 An antibody highly competitive to 4G2 (low avidity FLE antibody) has been reported to

200 protect mice from lethal DENV infection with ADE [49]. Since we had not established an *in*

201 *vivo* ADE infection model, competition assays were conducted. Competitive ELISA showed

202 that 3G9 strongly competed with 4G2 but not with other mouse monoclonal antibodies (7F4

203 and 15C12, targeting the central part of domain II and the A strand of domain III,

204 respectively) (Fig. 6A) [20]. 3G9 inhibited 4G2 binding by more than 50% when both were

205 applied to the assay at the same concentration.

206 It has been reported that the suppression of ADE caused by pre-existing antibodies *in*

207 *vitro* could be an indicator of *in vivo* protection efficacy [49]. Thus, a competitive ADE assay

208 was performed using 4G2 and DENV2-immunized mouse serum, which showed peak levels

209 of ADE at 100 ng/ml and a 1:640 dilution, respectively (Fig. 3, Fig. S2). These dilutions were

210 used, therefore, for the subsequent competitive ADE assay. 3G9-N297A suppressed the peak

211 ADE caused by 4G2 and D2-immunized mouse serum by 50% at only 30 ng/ml (Fig. 6B). A

212 previous study indicated that an antibody that strongly reduced ADE infection (>50%) at

213 1000 ng/ml offered good therapeutic efficacy in an *in vivo* ADE model [49]. The competition  
214 intensities found in the current study were higher than the threshold for *in vivo* protection  
215 quoted in the previous report, although direct comparison is impossible.

216

### 217 ***Immunogenetic analysis***

218 Even though 3G9 is an FLE antibody, it showed high potency in terms of NT<sub>50</sub>  
219 values and *in vivo* protection. Therefore, we analyzed the sequences of the 3G9 VH and VL  
220 regions using the IMGT tool to identify the closest VH and V $\lambda$  germline genes. The results  
221 indicated that the VH gene was derived from IGHV3-23\*02 and the V $\lambda$  gene from IGLV7-  
222 46\*01 (Table 5). Somatic hyper-mutation (SHM) rates of the VH and V $\lambda$  genes were 14.3%  
223 and 7.1%, respectively. The high SHM rate of the VH regions indicated the levels of affinity-  
224 maturation during the secondary infection [42].

## 225 **Discussion**

226           To date, no specific therapeutic agent against flavivirus infection has been made  
227 available. Considering the current success of antibody therapy against respiratory syncytial  
228 virus and Ebola virus infections, antibody therapy for dengue is a promising target. DENV-  
229 neutralizing HuMAbs have been reported using various techniques and patient backgrounds  
230 [24-26,29,31]. The objective of this study was to establish therapeutic antibody candidates  
231 against dengue using the newly developed SPYMEG cell technology [30,31]. Multiple  
232 experiments were attempted using blood samples from dengue patients with various  
233 backgrounds. We successfully established eight HuMAb clones from a single dengue patient.  
234 The patient whose hybridoma was successfully established was in the acute phase of secondary  
235 dengue infection, indicating that the B cells were highly activated and IgG repertoire was  
236 abundant. The SPYMEG cell fusion method was highly successful when the patient was in the  
237 acute infection phase, which was consistent the results of a previous study [31]. The circulating  
238 serotypes and/or genotypes of DENV vary depending on the region and year [50,51]. These  
239 antibodies, therefore, could be a potent therapeutic agent for use against DENV strains  
240 circulating in Southeast Asia including Indonesia, which is one of the largest dengue-endemic  
241 countries.

242           Several groups have found potent neutralizing HuMAbs against DENV. In general,  
243 highly potent neutralizing antibodies are serotype-specific, bind to E-dimers or quaternary-

244 structure epitopes, and inhibit both pre- and post-attachment steps [52]. In contrast, weak  
245 neutralizing antibodies are highly cross-reactive, bind to E-monomer FLEs, and inhibit the  
246 only pre-attachment step. All of the HuMAbs cloned in this study exhibited characteristics of  
247 weak neutralizing antibodies. However, they showed considerably low NT<sub>50</sub> values,  
248 especially against DENV-2. The NT<sub>50</sub> values were <0.1 µg/ml, as low as those of previously  
249 reported highly potent neutralizing antibodies [52]. However, these values cannot be  
250 compared directly, because the neutralizing antibody titer is influenced by the host cell type,  
251 degree of viral maturation, virion breathing, and other assay conditions [53,54]. Thus, 4G2 (a  
252 low neutralizing FLE antibody) was used to standardize the NT<sub>50</sub> assay. One of the HuMAb  
253 clones, 3G9, exhibited a NT<sub>50</sub> that was 1000-fold lower than that of 4G2 against DENV-2  
254 (Table 1). This was comparable to the findings of a previous study on potent neutralizing  
255 antibodies [55], corroborating the suggestion that 3G9 is a promising therapeutic antibody.

256 High neutralizing potency, especially against DENV-2, is beneficial, because the only  
257 licensed dengue vaccine (CYD-TDV) confers low-level protection against DENV-2 [56,57].  
258 Cross-reactive neutralization is reported to play an important role in DENV-2 protection, while  
259 serotype-specific neutralization is key to protection against other serotypes [58]. The HuMAbs  
260 described in this study could compensate for the drawbacks associated with the current dengue  
261 vaccine.

262 3G9 also neutralized other flaviviruses, with NT<sub>50</sub> values of around 0.1 µg/ml. As

263 ZIKV is less susceptible to FLE antibodies, due to high thermostability and less virion breathing  
264 [59,60], a potent neutralizing antibody targeting both DENV and ZIKV could be promising,  
265 considering their co-circulation in the environment and the occurrence of ADE in both diseases  
266 [10,11]. The HuMAbs identified in this study may be applied therapeutically in the treatment  
267 of pan-flavivirus infections.

268 All of the HuMAbs investigated were sensitive to W101A mutation, which is a typical  
269 characteristic of FLE antibodies [26]. Although all of the HuMAbs recognized the fusion loop,  
270 the epitope type was further classified into three groups (Table 3). Group 1 (1C3 and 1E5)  
271 recognized W101 and L107; group 2 (1C5) recognized W101, L107, and F108; group 3 (1F11,  
272 2C2, 2G2, 3E1, and 3G9) recognized W101 and F108. Group 1 and 2 antibodies, which  
273 recognize the L107 residue, were 4–50 times less potent than those of group 3. Accordingly,  
274 L107 could be a marker for low neutralization activity, and F108 might be critical to viral fusion  
275 or internalization.

276 Other groups have reported potent neutralizing antibodies that target FLEs. For  
277 example, 2A10G6, targeting D98, R99, and W101 motifs within the fusion loop, has a broad  
278 neutralizing capability against all four serotypes of DENV and protects mice against lethal  
279 challenges from DENV and WNV [61]. 753C12, targeting both the fusion loop and adjacent  
280 bc-loop, exhibits low NT<sub>50</sub> values [62]. Furthermore, E60 is a potent neutralizing FLE antibody  
281 [49,63]. These reports substantiate the potential of FLE antibodies.



282 No viral escape mutant was obtained, even after 5 viral passages in the presence of the  
283 HuMAbs in Vero cells. The fusion loop is highly conserved among flavivirus, and an escape  
284 mutation at this position would be lethal to the virus. This feature also could be an advantage  
285 to the development of therapeutics.

286 Generally, cross-reactive non-conformational epitopes are less neutralizing, while  
287 serotype-specific conformational epitopes are highly potent [52]. Most serotype-specific  
288 antibodies are induced at the primary infection stage, while cross-reactive FLE antibodies are  
289 induced exclusively at the secondary infection phase [22,23]. Tsai et al reported that FLE  
290 antibodies derived from patients with a secondary infection are more potent than those  
291 from patients with a primary infection [62]. Considering the high SHM rate (14.2%) on the V  
292 gene (Table 5), 3G9 was considerably affinity-matured, and, therefore, potent [42]. In  
293 addition, as a third or fourth DENV infection is less possible, affinity-matured FLE antibodies  
294 play an important role in viral protection [64].

295 Although the HuMAbs investigated in this study were promising in intensity and  
296 breadth of neutralization, strong ADE was observed. DENV-2 was slightly neutralized at a high  
297 concentration of IgG in the ADE assay, coinciding with the high level of neutralization activity  
298 in Vero cells. Meanwhile, the other serotypes of DENV were not neutralized. The ADE assay  
299 measures the balance of neutralizing and enhancing activities, and, thus, no neutralizing activity  
300 was observed [38]. The HuMAb clones were subtyped as IgG1, which show relatively higher

301 levels of ADE activity [65]. These data indicate that modification of the Fc region is mandatory  
302 prior to therapeutic application.

303 Fc-modified 3G9 neutralized DENV at a similar level to the original antibodies, but  
304 ADE was not observed, even at sub-neutralizing levels *in vitro*. In addition, these recombinant  
305 antibodies significantly prolonged the survival of the infected mice, compared with the original  
306 antibody. Some groups have reported that disrupting the Fc-interaction significantly enhances  
307 survival rates [42,44,49], while other groups have demonstrated the attenuation of protection  
308 or no significant difference [41,43]. Our study demonstrated a significantly improved survival  
309 rate and no difference among the three recombinant antibodies. These data suggested that  
310 disrupting Fc-interactions is promising, at least in mice, regardless of the mutations. We used  
311 IFN- $\alpha/\beta/\gamma$ R knock-out C57BL/6 mice, which are genetically distinct from AG129 mice; the  
312 latter are commonly used for dengue virus challenge experiments. This difference did not  
313 appear to affect the phenotype of the mice infected with DENV [48]. However, it is still possible  
314 that the genetic background and viral strain may have resulted in a different outcome from the  
315 virus challenge experiment.

316 3G9 did not completely prevent death by viral infection in our model. This may reflect  
317 the fact that 3G9 showed less neutralizing activity to DENV-3 than the other DENV serotypes  
318 (Table 1). In addition, we challenged each mouse with a high amount of virus ( $2 \times 10^6$  focus  
319 forming unit [FFU]). Nevertheless, Fc-modified 3G9 prevented the death of 80% of the mice

320 at 20 days post-infection. This antibody would be expected to protect the mice against DENV-  
321 2 efficiently, considering the 2–4-fold lower NT<sub>50</sub> value of DENV-2 (Table 1). Again, the results  
322 indicated that Fc-modified 3G9 is a good therapeutic candidate.

323           While our data suggests the importance of eliminating the ADE function of  
324 protective antibodies, a limitation of our study was the lack of animal experiments using an  
325 ADE model. Williams et. al. reported that the assay of antibody competition or ability to  
326 displace low-avidity FLE antibodies and reduce ADE *in vitro* could enable the prediction of *in*  
327 *vivo* therapeutic efficacy with ADE [49]. Our ADE competition assay data revealed that 3G9  
328 competes with 4G2 and polyclonal immunized-mouse serum (Fig. 6). The observed degree of  
329 competitiveness was stronger than that shown previously by E60, a potent neutralizing FLE  
330 antibody [49], although direct comparison was impossible. An affinity-matured FLE antibody  
331 would be superior to other potent neutralizing antibodies targeting the DI-DII hinge region or  
332 DIII, in terms of competing with pre-existing ADE-prone FLE antibodies, which may warrant  
333 the suppression of ADE *in vivo* [49].

334           In conclusion, we have described a potent HuMAb, 3G9, which targets FLE. Fc-  
335 modified 3G9 displayed neutralizing potency *in vivo*. The affinity-matured FLE antibody has  
336 several features that make it appropriate for therapeutic application including a low NT<sub>50</sub> value,  
337 potential for pan-flavivirus infection treatment, competition with pre-existing ADE-prone  
338 antibodies, and less potential for viral escape. This study reconfirms the therapeutic potency of

339 affinity-matured FLE antibodies.

340

341 **Methods**

342 ***Ethical statement and patient recruitment***

343 Blood samples were collected from patients with dengue at a private hospital in  
344 Surabaya, Indonesia. Signed informed consent was acquired from the patients or their parents  
345 upon collection of blood samples. This study was approved by the Ethics Committees of  
346 Airlangga University (Ethics Committee Approval Number: 24-934/UN3.14/PPd/2013) and  
347 Kobe University Graduate School of Medicine (Ethics Committee Approval Number: 784).  
348 Diagnosis data were obtained from medical records.

349 All animal experiments were performed at the National Institute of Infectious Diseases  
350 in Japan (NIID), in accordance with the guidelines for the care and use of laboratory animals at  
351 the NIID. The study was approved by the Animal Experiment Committee of the NIID (Ethics  
352 Committee Approval Number: 115064). Trained laboratory personnel performed the anesthesia  
353 of mice via i.p. injection of a mixture of medetomidine, midazolam, and butorphanol during  
354 viral inoculation and euthanasia by cervical dislocation.

355

356 ***Hybridoma preparation***

357 Approximately 5 ml of blood were obtained from one patient and the peripheral blood  
358 mononuclear cells were isolated by centrifugation using a Ficoll-Paque PLUS (GE Healthcare,  
359 Uppsala, Sweden). These cells were then fused with SPYMEG cells at a ratio of 10:1, to

360 establish hybridomas, as described previously [30,31].

361

### 362 *Cell lines*

363 The SPYMEG cells and established hybridomas were maintained in Dulbecco's  
364 modified Eagle medium (DMEM) supplemented with 15% fetal bovine serum (FBS) and 3%  
365 BM-condimed (Sigma Aldrich, St. Louis, MO) [18]. Vero cells were cultured in Eagle's  
366 minimum essential medium (MEM) supplemented with 10% FBS and 60 µg/ml kanamycin.  
367 C6/36 cells were cultured in MEM supplemented with 10% FBS, nonessential amino acids, and  
368 60 µg/ml kanamycin. HEK-293T cells were maintained in DMEM supplemented with 10%  
369 FBS. K562 erythroleukemia cells were cultivated in RPMI 1640 medium supplemented with  
370 10% FBS, 100 units/ml penicillin, and 100 µg/ml streptomycin. FreeStyle 293-F cells  
371 (Invitrogen, Gaithersburg, MD) were cultured in FreeStyle 293 Expression Medium (Thermo  
372 Fisher Scientific, Waltham, MA).

373

### 374 *Viruses*

375 DENV-1 genotype I, DENV-2 cosmopolitan genotype, DENV-3 genotype I, and  
376 DENV-4 genotype II, which are typical isolates found in Surabaya, Indonesia, were used for  
377 the antibody characterization [50,51]. Sequence information is available upon request. In  
378 addition, the Mochizuki strain of DENV-1, NGC strain of DENV-2, H87 strain of DENV-3,

379 H241 strain of DENV-4, and Nakayama strain of JEV were used as prototype viruses [66]. The  
380 DENV-3 strain P12/08, derived from patients infected with DENV-3 in Thailand in 2008, was  
381 used in the animal experiments [48]. Viruses were propagated in C6/36 cells and stored at -  
382 80°C until use.

383

#### 384 *Hybridoma screening by ELISA*

385 Rabbit serum immunized with the DENV-2 NGC strain was coated onto Nunc  
386 Maxisorp ELISA plates (Thermo Fisher Scientific, Waltham, MA). Then, the DENV-2  
387 Indonesian strain (inactivated with Tween 20), hybridoma culture (or DMEM as a negative  
388 control), alkaline phosphatase (AP) conjugated anti-human IgG (Abcam, Canbridge, UK), and  
389 p-nitrophenyl phosphate (PNPP) (Nacalaitesque, Kyoto, Japan) were serially incubated, and the  
390 absorbance was measured at 415 nm. The wells showing higher values than the average + 3SD  
391 of the negative controls were considered to be positive.

392

#### 393 *Isotyping and quantification of HuMAbs*

394 HuMAbs were isotyped using anti-human IgG1, IgG2, IgG3, or IgG4 by ELISA  
395 (Abcam, Canbridge, UK). HuMAbs were coated onto the ELISA plates. Then, murine anti-  
396 human IgG (anti-IgG1, IgG2, IgG3, or IgG4), AP-conjugated anti-mouse IgG, and PNPP were  
397 serially incubated, and the absorbance was measured at 415 nm. The subclass of each HuMAb

398 was determined following the targeted identification of the first antibody's subclass, which  
399 showed the highest value among IgG1 to IgG4. Human IgG was quantified using a Human IgG  
400 Quantification kit (RD Biotech, Besançon, France).

401

#### 402 ***Preparation of single round infectious particles***

403 pCMV-JErep-fullC, a pcDNA3 plasmid containing JEV genes encoding the whole C  
404 and all the NS proteins, was transfected into 293T cells with a prM-E expression plasmid of the  
405 WNV NY99 strain or ZIKV MR776 strain, to prepare SRIPs [33,34]. The culture media  
406 containing the SRIPs were harvested 3 days post-transfection. The harvested SRIPs were  
407 subjected to neutralization tests.

408

#### 409 ***Antibodies and immunized serum***

410 D1-4G2 (anti-E protein, cross-reactive to the flavivirus group; American Type Culture  
411 Collection, Manassas, VA) and JE-2D5 (anti-JEV-NS1 protein) were used to detect virus-  
412 infected and SRIP-infected cells, respectively (see below) [33]. Two mouse monoclonal  
413 antibodies, 7F4 (targeting the central part of DII) and 15C12 (targeting the A strand of DIII),  
414 were used for the competition ELISA [20].

415 In addition, a mouse polyclonal antibody against DENV-2 (immunized mouse serum)  
416 was used for the competition ADE assay. Six-week old BALB/c mice were immunized three



417 times with 100 µg of DNA vaccine (prM-E protein expression plasmid) intratibially, at two-  
418 week intervals [66]. Blood samples were collected one week after the third immunization.

419

#### 420 ***Titration of viral infectivity and neutralization test***

421 Infective titers were determined in Vero cells on a 96-well plate, by counting the  
422 infectious foci after immunostaining (see below) and expressed as FFU.

423 Neutralizing tests were performed as described previously [66]. Briefly, flat-bottom  
424 96-well plates were seeded with Vero cells ( $2 \times 10^4$  cells/well). The following day, 100 FFU of  
425 virus and serially diluted antibody were mixed and incubated for 1 h at 37°C, followed by  
426 inoculation into the Vero cells. At 24 h post-infection, the cells were fixed and immunostained  
427 (see below). The neutralizing antibody titer was expressed as the minimum IgG concentration  
428 yielding a 50% reduction in focus number (NT<sub>50</sub>).

429

#### 430 ***Immunostaining***

431 Immunostaining was performed as described previously [66]. Briefly, infected cells  
432 were fixed with acetone-methanol (1:1). These cells were incubated serially with the antibodies  
433 described above, biotinylated anti-mouse or -human IgG, a VECTASTAIN Elite ABC kit  
434 (Vector Laboratories, Burlingame, CA), and a VIP peroxidase substrate kit (Vector Laboratories,  
435 Burlingame, CA).

436

437 ***Time of addition assay***

438 A time of addition assay was carried out, as described previously [36]. For the pre-  
439 adsorption assay, approximately 100 FFU of virus were pre-incubated with serially diluted  
440 HuMAbs for 1 h at 4°C and then inoculated onto  $2 \times 10^4$  Vero cells on a 96-well plate. Then,  
441 the unadsorbed viruses and excess antibodies were washed out with PBS. The cells were then  
442 incubated for 24 h at 37°C, followed by immunostaining and focus counting.

443 For the post-adsorption assay, virus was added directly to the cells for 1 h at 4°C. Then,  
444 unadsorbed virus was removed by washing the cells with PBS three times, and bound virus was  
445 incubated with serially diluted HuMAbs for an additional hour at 4°C. The cells were then  
446 incubated for 24 h at 37°C, followed by immunostaining and focus counting. The results are  
447 expressed in the same way as for the neutralization assay.

448

449 ***Epitope mapping***

450 Epitope mapping was conducted as reported previously [37]. A DENV2 (strain 16681)  
451 prM-E expression construct was subjected to high-throughput 'Shotgun Mutagenesis',  
452 generating a comprehensive mutation library. Each prM-E residue of the construct was changed  
453 individually to alanine (alanine residues to serine). In total, 661 DENV2 mutants were  
454 generated (100% coverage of prM-E). HEK-293T cells were transfected with an expression

455 vector for DENV-2 prM-E or its mutants, fixed with 4% paraformaldehyde, and intracellular  
456 MAb binding was detected using a high-throughput immunofluorescence flow cytometry assay.  
457 Antibody reactivity against each mutant protein clone was calculated relative to the reactivity  
458 of the wild-type protein. Each raw data point was background-subtracted and normalized to the  
459 value for reactivity with wild-type DENV2 prM-E. Mutations within clones were identified as  
460 critical to the MAb epitope if they did not support reactivity of the MAb (<20% of the MAb's  
461 reactivity with wild-type prM-E) but did support reactivity of other conformation-dependent  
462 MAbs (>70% of reactivity with wild-type).

463

#### 464 ***Generation of escape mutants***

465 The DENV-2 NGC strain was passaged 5 times in the presence of the HuMAbs in  
466 Vero cells. The concentration of HuMAbs was increased with passages, starting from NT<sub>50</sub> to  
467 5 times NT<sub>50</sub>. Surviving viruses were sequenced in the E region.

468

#### 469 ***ADE assay***

470 ADE activity was measured using semi-adherent K562 cells and expressed as the  
471 number of infected cells [38]. Briefly, serial four-fold dilutions of antibody samples were  
472 incubated with 100 FFU virus for 2 h at 37°C in 96 well poly-L-lysine coating plates. The  
473 mixture was mixed with  $1 \times 10^5$  K562 cells and incubated for a further 2 days. After

474 immunostaining, viral foci were counted manually. The baseline of the infected cells (without  
475 antibody) was 2.0 (100 FFU). The infected cell number fell lower than 2.0 when the virus was  
476 neutralized but rose higher when ADE occurred.

477

#### 478 ***Generation of Fc-modified recombinant antibodies***

479 RNA was extracted from  $5 \times 10^6$ – $10 \times 10^6$  hybridoma cells using TRIzol reagent  
480 (Invitrogen, Gaithersburg, MD). Heavy (H)- and light (L)-chain cDNAs containing the gene  
481 encoding the antibody-binding (Fab) region of 3G9 were amplified and sequenced, as  
482 previously reported [67]. Then, primer sets were designed to clone the Fab regions of H and L  
483 chains into pFUSE-hIgG1-Fc1 and pFUSE2-CLIg-hL2, respectively (InvivoGen, San Diego,  
484 CA). Gene cloning was performed following the manufacturer's instructions (primer  
485 information is available upon request).

486 Then, three kinds of mutation [L234A/L235A(LALA), D265A, and N297A] that  
487 abolished Fc-Fc receptor interaction were introduced into the Fc region using a site-directed  
488 mutagenesis kit, following the manufacturer's protocol (TOYOBO, Osaka, Japan) [39].

489 The plasmids containing H- or L-chain genes (50 µg each) were transduced to  $1 \times 10^8$   
490 293F cells using 293fectin reagent (ThermoFisher Scientific, Waltham, MA). After incubating  
491 the cells at 37°C for 4 days, the culture fluids were harvested and purified by protein G (GE  
492 Healthcare, Chicago, IL). The concentration of purified IgG was calculated by measuring the

493 absorbance at 280 nm. Purified IgG was then used in neutralization tests, ADE assays, and  
494 animal experiments (see below).

495

#### 496 *Animal experiments*

497 Five or six 6-week old IFN- $\alpha/\beta/\gamma$ R KO C57BL/6 mice per group were challenged i.p.  
498 with  $2 \times 10^6$  FFU of DENV-3 (P12/08) under anesthesia. Twenty hours post challenge, HuMAbs  
499 1F11, 3G9, 3G9-LALA, 3G9-N265A, or 3G9-N297A (500  $\mu$ g/mouse) were injected i.p., and  
500 the mice were observed for 20 days. Mice were euthanized for humane purposes if they showed  
501 apparent symptoms.

502

#### 503 *Competition assays*

504 Competition ELISA: The DENV-2 NGC strain was coated on ELISA plates, as  
505 described above. Then, 1  $\mu$ g/mL of each type of mouse monoclonal antibody (4G2, 7F4, or  
506 15C12) was mixed with serially diluted 3G9 (four 10-fold dilutions starting at 10  $\mu$ g/mL) in a  
507 separate 96-well plate, and 100  $\mu$ l of the mixture were added to each ELISA plate. The plates  
508 were then incubated with AP-conjugated anti-mouse IgG, followed by color development with  
509 PNPP. The relative optical density (OD) was expressed as the average OD of each sample  
510 divided by the OD of the non-competition control well (without 3G9).

511 Competition ADE: Serially diluted 3G9-N297A (eight 2-fold dilutions starting at 2000 ng/ml)

512 solutions were prepared in a separate 96-well plate, followed by the addition of 4G2 or DENV-  
513 2 immunized to the concentration that showed peak enhancement of DENV-2 infection in K562  
514 cells. Then, 36  $\mu$ l of the mixture were used for the ADE assay, as described above [38]. Relative  
515 infection was expressed as the average number of infected cells in each sample divided by the  
516 number of infected cells in the non-competition control well (without 3G9-N297A, around 1000  
517 cells).

518

### 519 *Statistics*

520 All error bars indicate standard deviations. All calculations were performed using  
521 GraphPad Prism 8 (GraphPad Software Inc.).

522

523 **References**

- 524 1. Pierson, T. C. & Diamond, M. S. The continued threat of emerging flaviviruses. *Nat.*  
525 *Microbiol.* **5**, 796-812 (2020).
- 526 2. Halstead, S. B. Dengue. *Lancet* **370**, 1644-1652 (2007).
- 527 3. World Health Organization (WHO). Handbook for clinical management of dengue, 2012,  
528 Available from: <http://www.who.int/denguecontrol/9789241504713/en>
- 529 4. Bhatt, S., *et al.* The global distribution and burden of dengue. *Nature* **496**, 504–507 (2013).
- 530 5. Thomas, S. J. & Endy, T. P. Current issues in dengue vaccination. *Curr. Opin. Infect. Dis.*  
531 **26**, 429-434 (2013).
- 532 6. Halstead, S. B. & O'Rourke, E. J. Dengue viruses and mononuclear phagocytes. I.  
533 Infection enhancement by non-neutralizing antibody. *J. Exp. Med.* **146**, 201-217 (1977).
- 534 7. Vaughn, D. W., *et al.* Dengue viremia titer, antibody response pattern, and virus serotype  
535 correlate with disease severity. *J. Infect. Dis.* **181**, 2-9 (2000).
- 536 8. Hadinegoro, S. R., *et al.* Efficacy and long-term safety of a dengue vaccine in regions of  
537 endemic disease. *N. Engl. J. Med.* **373**, 1195-1206 (2015).
- 538 9. Aguiar, M., Stollenwerk, N. & Halstead, S. B. The impact of the newly licensed dengue  
539 vaccine in endemic countries. *PLOS Negl. Trop. Dis.* **10**, e0005179 (2016).
- 540 10. Castanha, P., *et al.* Dengue virus-specific antibodies enhance Brazilian Zika virus infection.  
541 *J. Infect. Dis.* **215**, 781-785 (2017).

- 542 11. Kawiecki, A. B. & Christofferson, R. C. Zika virus-induced antibody response enhances  
543 dengue virus Serotype 2 replication in vitro. *J. Infect. Dis.* **214**, 1357-1360 (2016).
- 544 12. Junjhon, J., *et al.* Influence of pr-M cleavage on the heterogeneity of extracellular dengue  
545 virus particles. *J. Virol.* **84**, 8353-8358 (2010).
- 546 13. Pierson, T. C. & Diamond, M. S. Degrees of maturity: the complex structure and biology  
547 of flaviviruses. *Curr. Opin. Virol.* **2**, 168-175 (2012)
- 548 14. Kuhn, R. J., Dowd, K. A., Beth Post, C. & Pierson, T. C. Shake, rattle, and roll: impact of  
549 the dynamics of Flavivirus particles on their interactions with the host. *Virology* **479-480**,  
550 508-517 (2015).
- 551 15. Dowd, K. A., DeMaso, C. R. & Pierson, T. C. Genotypic differences in dengue virus  
552 neutralization are explained by a single amino acid mutation that modulates virus  
553 breathing. *mBio* **6**, e01559-e01515 (2015).
- 554 16. Tsai, W. Y. *et al.* Potent neutralizing human monoclonal antibodies preferentially target  
555 mature dengue virus particles: implication for novel strategy for dengue vaccine. *J. Virol.*  
556 **92**, e00556-18 (2018).
- 557 17. Roehrig, J. T. Antigenic structure of Flavivirus proteins. *Adv. Virus Res.* **59**, 141-175  
558 (2003).
- 559 18. Modis, Y., Ogata, S., Clements, D. & Harrison, S. C. A ligand-binding pocket in the dengue  
560 virus envelope glycoprotein. *Proc. Natl Acad. Sci. U. S. A.* **100**, 6986-6991 (2003).



- 561 19. Kuhn, R. J., *et al.* Structure of dengue virus: implications for Flavivirus organization,  
562 maturation, and fusion. *Cell* **108**, 717-725 (2002).
- 563 20. Yamanaka, A., Kotaki, T. & Konishi, E. A mouse monoclonal antibody against dengue  
564 virus type 1 Mochizuki strain targeting envelope protein domain II and displaying strongly  
565 neutralizing but not enhancing activity. *J. Virol.* **87**, 12828-12837 (2013).
- 566 21. Rodrigo, W. W., *et al.* Dengue virus neutralization is modulated by IgG antibody subclass  
567 and Fcγreceptor subtype. *Virology* **394**, 175-182 (2009).
- 568 22. Lin, H. E., *et al.* Analysis of epitopes on dengue virus envelope protein recognized by  
569 monoclonal antibodies and polyclonal human sera by a high throughput assay. *PLOS Negl.*  
570 *Trop. Dis.* **6**, e1447 (2012).
- 571 23. Lai, C. Y., *et al.* Antibodies to envelope glycoprotein of dengue virus during the natural  
572 course of infection are predominantly cross-reactive and recognize epitopes containing  
573 highly conserved residues at the fusion loop of domain II. *J. Virol.* **82**, 6631-6643 (2008).
- 574 24. Teoh, E. P., *et al.* The structural basis for serotype-specific neutralization of dengue virus  
575 by a human antibody. *Sci. Transl. Med.* **4**, 139ra83 (2012).
- 576 25. de Alwis, R., *et al.* Identification of human neutralizing antibodies that bind to complex  
577 epitopes on dengue virions. *Proc. Natl Acad. Sci. U. S. A.* **109**, 7439–7444 (2012).
- 578 26. Dejnirattisai, W., *et al.* A new class of highly potent, broadly neutralizing antibodies  
579 isolated from viremic patients infected with dengue virus. *Nat. Immunol.* **16**, 170-177

580 (2015).

581 27. de Alwis, R., *et al.* In-depth analysis of the antibody response of individuals exposed to  
582 primary dengue virus infection. *PLOS Negl. Trop. Dis.* **5**, e1188 (2011).

583 28. Wahala, W. M. P. B., Kraus, A. A., Haymore, L. B., Accavitti-Loper, M. A. & de Silva, A.  
584 M.. Dengue virus neutralization by human immune sera: role of envelope protein domain  
585 III-reactive antibody. *Virology* **392**, 103-113 (2009).

586 29. Smith, S. A., *et al.* The potent and broadly neutralizing human dengue virus-specific  
587 monoclonal antibody 1C19 reveals a unique cross-reactive epitope on the bc loop of  
588 domain II of the envelope protein. *mBio* **4**, e00873-e00813 (2013).

589 30. Kubota-Koketsu, R., *et al.* Broad neutralizing human monoclonal antibodies against  
590 influenza virus from vaccinated healthy donors. *Biochem. Biophys. Res. Commun.* **387**,  
591 180-185 (2009)

592 31. Setthapramote, C., *et al.* Human monoclonal antibodies to neutralize all dengue virus  
593 serotypes using lymphocytes from patients at acute phase of the secondary infection.  
594 *Biochem. Biophys. Res. Commun.* **423**, 867-872 (2012).

595 32. Lanciotti, R. S., Calisher, C. H., Gubler, D. J., Chang, G. J. & Vorndam, A. V. Rapid  
596 detection and typing of dengue viruses from clinical samples by using reverse  
597 transcriptase-polymerase chain reaction. *J. Clin. Microbiol.* **30**, 545-551 (1992).

598 33. Yamanaka, A., Suzuki, R. & Konishi, E. Evaluation of single-round infectious, chimeric

- 599 dengue type 1 virus as an antigen for dengue functional antibody assays. *Vaccine* **32**, 4289-  
600 4295 (2014).
- 601 34. Yamanaka, A. *et al.* Utility of Japanese encephalitis virus subgenomic replicon-based  
602 single-round infectious particles as antigens in neutralization tests for Zika virus and three  
603 other flaviviruses. *J. Virol. Methods* **243**, 164-171 (2017).
- 604 35. Pierson, T. C., Fremont D. H., Kuhn, R. J. & Diamond, M. S. Structural Insights into the  
605 Mechanisms of Antibody-Mediated Neutralization of Flavivirus Infection: Implications  
606 for Vaccine Development. *Cell Host Microbe*. **4**, 229-238 (2008).
- 607 36. Hung, S. L. *et al.* Analysis of the steps involved in dengue virus entry into host cells.  
608 *Virology* **257**, 156-167 (1999).
- 609 37. Davidson, E. & Doranz, B. J. A high-throughput shotgun mutagenesis approach to  
610 mapping B-cell antibody epitopes. *Immunology* **143**, 13-20 (2014).
- 611 38. Konishi, E., Tabuchi, Y. & Yamanaka, A. A simple assay system for infection-enhancing  
612 and -neutralizing antibodies to dengue type 2 virus using layers of semi-adherent K562  
613 cells. *J. Virol. Methods* **163**, 360-367 (2010).
- 614 39. Saunders, K. O. Conceptual approaches to modulating antibody effector functions and  
615 circulation half-life. *Front. Immunol.* **10**, 1296 (2019).
- 616 40. Fibriansah, G. *et al.* DENGUE VIRUS. Cryo-em structure of an antibody that neutralizes  
617 dengue virus type 2 by locking e protein dimers. *Science* **349**, 88-91 (2015).

- 618 41. Ramadhany, R., *et al.* Antibody with an engineered Fc region as a therapeutic agent against  
619 dengue virus infection. *Antiviral Res.* **124**, 61-68 (2015).
- 620 42. Xu, M. *et al.* A potent neutralizing antibody with therapeutic potential against all four  
621 serotypes of dengue virus. *NPJ Vaccines* **2**, 2. doi: 10.1038/s41541-016-0003-3 (2017).
- 622 43. Hu, D., *et al.* A broadly neutralizing germline-like human monoclonal antibody against  
623 dengue virus envelope domain III. *PLOS Pathog.* **15**, e1007836 (2019).
- 624 44. Balsitis, S. J., *et al.* Lethal antibody enhancement of dengue disease in mice is prevented  
625 by Fc modification. *PLOS Pathog.* **6**, e1000790 (2010).
- 626 45. Goncalvez, A. P., Engle, R. E., St Claire, M., Purcell, R. H. & Lai, C. J. Monoclonal  
627 antibody-mediated enhancement of dengue virus infection in vitro and in vivo and  
628 strategies for prevention. *Proc. Natl Acad. Sci. U. S. A.* **104**, 9422-9427 (2007).
- 629 46. Hessel, A. J., *et al.* Fc receptor but not complement binding is important in antibody  
630 protection against HIV. *Nature* **449**, 101-104 (2007).
- 631 47. Shields, R. L., *et al.* High resolution mapping of the binding site on human IgG1 for Fc  
632 Gamma RI, Fc Gamma RII, Fc Gamma RIII, and FcRn and Design of IgG1 variants with  
633 improved binding to the Fc Gamma R. *J. Biol. Chem.* **276**, 6591-6604 (2001).
- 634 48. Phanthawiboon, S. *et al.* Acute systemic infection with dengue virus leads to vascular  
635 leakage and death through tumor necrosis factor- $\alpha$  and Tie2/angiopoietin signaling in mice  
636 lacking type I and II interferon receptors. *PLOS ONE* **11**, e0148564 (2016).

- 637 49. Williams, K. L., *et al.* Therapeutic efficacy of antibodies lacking Fcγ receptor  
638 binding against lethal dengue virus infection is due to neutralizing potency and blocking  
639 of enhancing antibodies [corrected]. *PLOS Pathog.* **9**, e1003157 (2013).
- 640 50. Kotaki, T., *et al.* Continuous dengue type 1 virus genotype shifts followed by co-  
641 circulation, clade shifts and subsequent disappearance in Surabaya, Indonesia, 2008–2013.  
642 *Infect. Genet. Evol.* **28**, 48-54 (2014).
- 643 51. Kotaki, T., *et al.* Divergence of the dengue virus type 2 Cosmopolitan genotype associated  
644 with two predominant serotype shifts between 1 and 2 in Surabaya, Indonesia, 2008–2014.  
645 *Infect. Genet. Evol.* **37**, 88-93 (2016).
- 646 52. Fibriansah, G. & Lok, S. M. The development of therapeutic antibodies against dengue  
647 virus. *Antiviral Res.* **128**, 7-19 (2016).
- 648 53. Rainwater-Lovett, K., Rodriguez-Barraquer, I., Cummings, D. A. & Lessler, J. Variation  
649 in dengue virus plaque reduction neutralization testing: systematic review and pooled  
650 analysis. *BMC Infect. Dis.* **12**, 233 (2012).
- 651 54. Thomas, S. J., *et al.* Dengue plaque reduction neutralization test (PRNT) in primary and  
652 secondary dengue virus infections: how alterations in assay conditions impact  
653 performance. *Am. J. Trop. Med. Hyg.* 825-833 (2009).
- 654 55. Budigi, Y., *et al.* Neutralization of antibody-enhanced dengue infection by VIS513, a pan  
655 serotype reactive monoclonal antibody targeting domain III of the dengue E protein. *PLOS*

- 656 *Negl. Trop. Dis.* **12**, e0006209 (2018).
- 657 56. Capeding, M. R., *et al.* Clinical efficacy and safety of a novel tetravalent dengue vaccine  
658 in healthy children in Asia: a phase 3, randomised, observer-masked, placebo-controlled  
659 trial. *Lancet* 1358-1365 (2014).
- 660 57. Villar, L., *et al.* Efficacy of a tetravalent dengue vaccine in children in Latin America. *N.*  
661 *Engl. J. Med.* 113-123 (2015).
- 662 58. Henein, S., *et al.* Dissecting antibodies induced by a chimeric yellow fever-dengue, live-  
663 attenuated, tetravalent dengue vaccine (CYD-TDV) in naive and dengue-exposed  
664 individuals. *J. Infect. Dis.* **215**, 351-358 (2017).
- 665 59. Barba-Spaeth, G., *et al.* Structural basis of potent Zika-dengue virus antibody cross-  
666 neutralization. *Nature* **536**, 48-53 (2016).
- 667 60. Kostyuchenko, V. A., *et al.* Structure of the thermally stable Zika virus. *Nature* **533**, 425-  
668 428 (2016).
- 669 61. Deng, Y. Q.; *et al.* A broadly Flavivirus cross-neutralizing monoclonal antibody that  
670 recognizes a novel epitope within the fusion loop of e protein. *PLOS ONE* **6**, e16059  
671 (2011).
- 672 62. Tsai, W. Y., *et al.* High-avidity and potently neutralizing cross-reactive human monoclonal  
673 antibodies derived from secondary dengue virus infection. *J. Virol.* **87**, 12562-12575  
674 (2013).

- 675 63. Oliphant, T., *et al.* Development of a humanized monoclonal antibody with therapeutic  
676 potential against West Nile virus. *Nat. Med.* **11**, 522-530 (2005).
- 677 64. Gibbons, R. V. *et al.* Analysis of repeat hospital admissions for dengue to estimate the  
678 frequency of third or fourth dengue infections resulting in admissions and dengue  
679 hemorrhagic fever, and serotype sequences. *Am. J. Trop. Med. Hyg.* **77**, 910-913 (2007).
- 680 65. Sasaki, T., *et al.* Dengue virus neutralization and antibody-dependent enhancement  
681 activities of human monoclonal antibodies derived from dengue patients at acute phase of  
682 secondary infection. *Antiviral Res.* **98**, 423-431 (2013).
- 683 66. Konishi, E., Kosugi, S. & Imoto, J. Dengue tetravalent DNA vaccine inducing neutralizing  
684 antibody and anamnestic responses to four serotypes in mice. *Vaccine* **24**, 2200-2207  
685 (2006).
- 686 67. Smith, K., *et al.* Rapid generation of fully human monoclonal antibodies specific to a  
687 vaccinating antigen. *Nat. Protoc.* **4**, 372-384 (2009).

688

689

690 **Acknowledgements**

691 This work was supported by a program from the Japan Initiative for Global Research  
692 Network on Infectious Diseases (J-GRID) through the Ministry of Education, Culture, Sport,  
693 Science and Technology in Japan, and the Japan Agency for Medical Research and  
694 Development (AMED); the Institute of Tropical Disease (ITD) and the Center of Excellence  
695 (COE) program from the Ministry of Research and Technology (RISTEK), Indonesia. pCMV-  
696 JRep-fullC and a plasmid containing prM-E gene of ZIKV were provided by Dr. Ryosuke  
697 Suzuki, NIID and Dr. Eiji Konishi, Osaka university, respectively. The funders had no role in  
698 study design, data collection and analysis, decision to publish, or preparation of the manuscript.  
699 The manuscript was proofread by Enago.

700

701 **Author contributions**

702 T. Kotaki and M.K. conceived the study. T. Kurosu performed the animal experiments.  
703 A.G., E.D., and B.J.D performed the epitope mapping. S.C., K.C.M., T.H.S., and S.S. helped to  
704 obtain clinical specimens. S.C., T.O., and O.P. helped to generate the HuMAbs. K.-I. O.  
705 provided critical reagents (SPYMEG cells). T. Kotaki performed the other experiments and  
706 took the lead in writing the manuscript. T.Kurosu, E.D., T.O., and M.K. provided feedback and  
707 helped shape the research and manuscript.

708



709 **Additional information**

710 **Competing interests**

711           The authors declare that they have no competing interests.

712

713 **Data availability**

714           The datasets generated during and/or analyzed during the current study are available

715 from the corresponding author on reasonable request.

716

717

718

719 **Table 1. NT<sub>50</sub> values of the HuMAbs**

720

|                        |        | Hybridoma clones |       |       |      |      |      |      |       |
|------------------------|--------|------------------|-------|-------|------|------|------|------|-------|
|                        |        | 1C3              | 1C5   | 1E5,  | 1F11 | 2C2  | 2G2  | 3E1  | 3G9   |
| Indonesian<br>isolates | DENV-1 | 0.90             | 1.89  | 0.65  | 0.24 | 0.59 | 0.21 | 1.00 | 0.24  |
|                        | DENV-2 | 0.12             | 2.67  | 0.69  | 0.02 | 0.04 | 0.02 | 0.05 | 0.02  |
|                        | DENV-3 | 0.87             | >3.60 | 0.92  | 1.29 | 3.39 | 1.99 | 2.41 | 0.73  |
|                        | DENV-4 | 0.64             | 1.70  | 0.89  | 0.02 | 0.12 | 0.13 | 0.24 | 0.13  |
| Prototype<br>strains   | DENV-1 | 3.46             | 3.07  | >3.86 | 0.84 | 6.17 | 3.33 | 3.48 | 3.45  |
|                        | DENV-2 | 0.03             | 0.18  | 0.21  | 0.09 | 0.10 | 0.20 | 0.11 | 0.06  |
|                        | DENV-3 | 0.38             | 0.34  | 0.38  | 0.11 | 0.30 | 0.44 | 0.62 | 0.12  |
|                        | DENV-4 | 0.89             | 0.09  | 0.17  | 0.03 | 0.11 | 0.06 | 0.22 | <0.04 |
| Other<br>flaviviruses  | JEV    | 1.33             | 0.74  | 0.87  | 0.21 | 0.71 | 0.85 | 0.44 | 0.47  |
|                        | WNV*   | -                | -     | -     | 0.17 | -    | -    | -    | 0.11  |
|                        | ZIKV*  | -                | -     | -     | 0.05 | -    | -    | -    | 0.11  |

721 Average of two independent neutralization tests are shown ( $\mu\text{g/ml}$ ).

722 \*The WNV and ZIKV results were determined using SRIPs containing the prM-E genes of  
723 each virus.

724

725 **Table 2. NT<sub>50</sub> values from the preadsorption and postadsorption assays**

726

|                 | Hybridoma clones |      |       |      |       |      |       |      |
|-----------------|------------------|------|-------|------|-------|------|-------|------|
|                 | 1C3              | 1C5  | 1E5   | 1F11 | 2C2   | 2G2  | 3E1   | 3G9  |
| Pre-adsorption  | 0.04             | 0.30 | 0.47  | 0.06 | 0.16  | 0.43 | 0.23  | 0.07 |
| Post-adsorption | >8.3             | >7.2 | >0.95 | >2.0 | >13.9 | >8.1 | >15.1 | >5.9 |

727 Averages of two independent neutralization tests are shown ( $\mu\text{g/ml}$ ).

728

729 **Table 3. Critical mutations that abolished HuMAb binding**

|                     | Hybridoma clones |       |       |       |       |       |       |       |
|---------------------|------------------|-------|-------|-------|-------|-------|-------|-------|
|                     | 1C3              | 1C5   | 1E5   | 1F11  | 2C2   | 2G2   | 3E1   | 3G9   |
| Critical<br>Residue | W101A            | W101A | W101A | W101A | W101A | W101A | W101A | W101A |
|                     | L107A            | L107A | L107A | F108A | F108A | F108A | F108A | F108A |
|                     |                  | F108A |       |       |       |       |       |       |

730

731 **Table 4. NT<sub>50</sub> values of Fc-modified 3G9**

|                          | 3G9-Original | 3G9-LALA | 3G9-N265A | 3G9-N297A |
|--------------------------|--------------|----------|-----------|-----------|
| NT <sub>50</sub> (µg/ml) | 0.069        | 0.053    | 0.042     | 0.066     |

732 Averages of two independent neutralization tests are shown (µg/ml).

733

734 **Table 5. Immunogenetic analysis of 3G9**

|             | V gene      | D gene      | J gene   | V region<br>AA mutations | CDR3          |
|-------------|-------------|-------------|----------|--------------------------|---------------|
| Heavy chain | IGHV3-23*02 | IGHD3-16*01 | IGHJ4*02 | 14.3%<br>(14/98)         | AKLFGVGDSGDGY |
| Light chain | IGLV7-46*01 | -           | IGLJ3*02 | 7.1%<br>(7/98)           | LLSYGGGRP     |

735 The closest germline genes were determined using the IMGT tool.

736

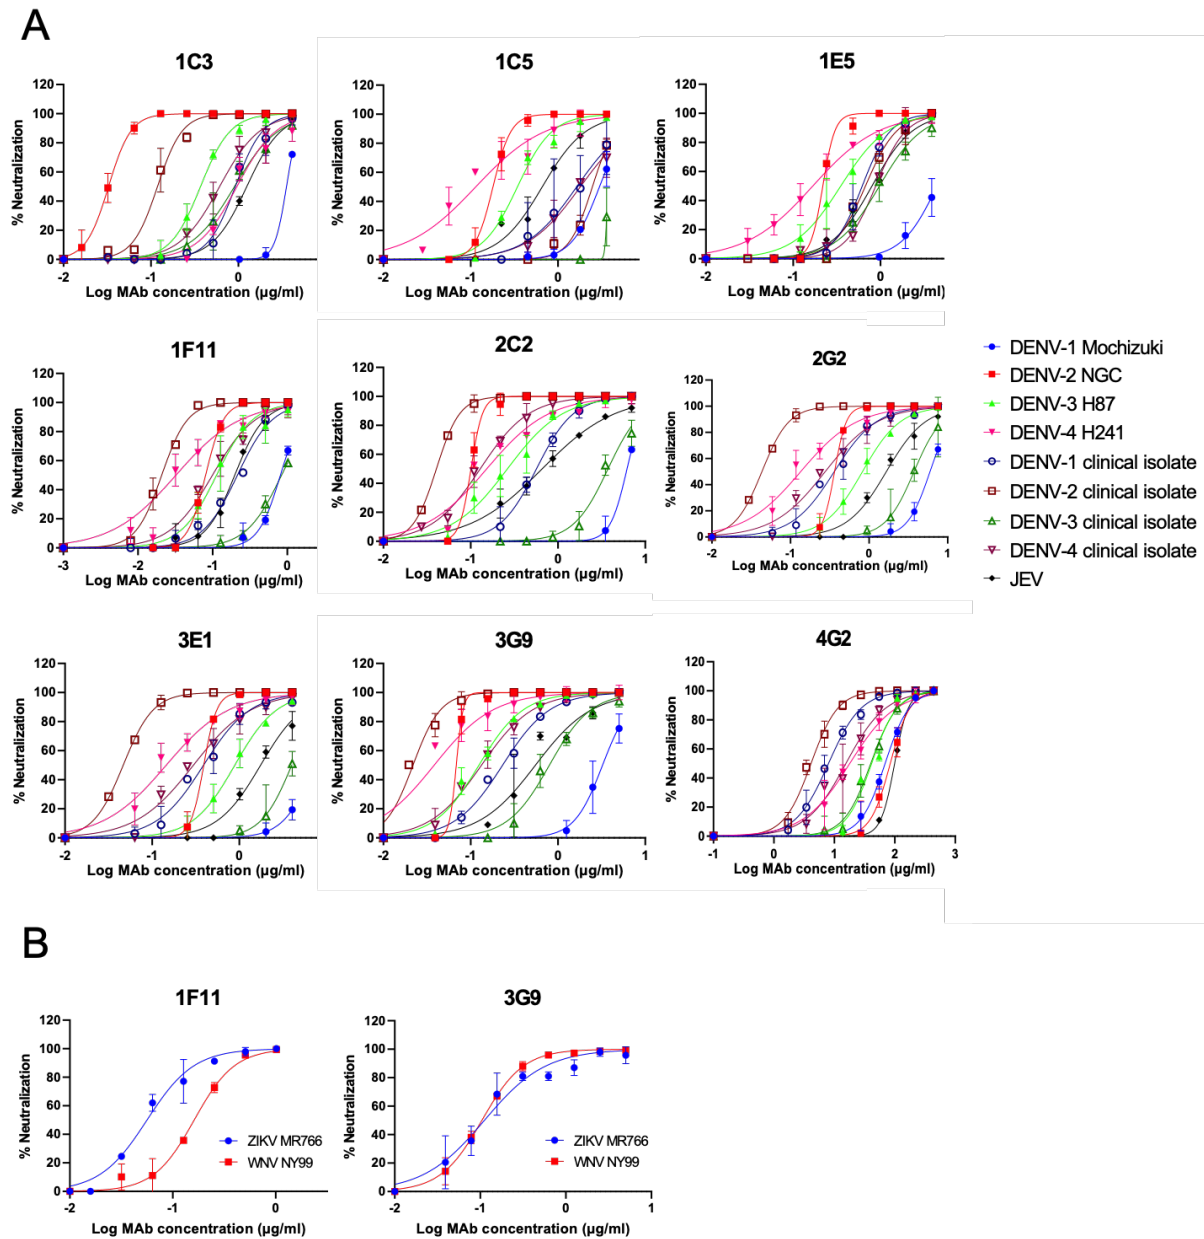

743

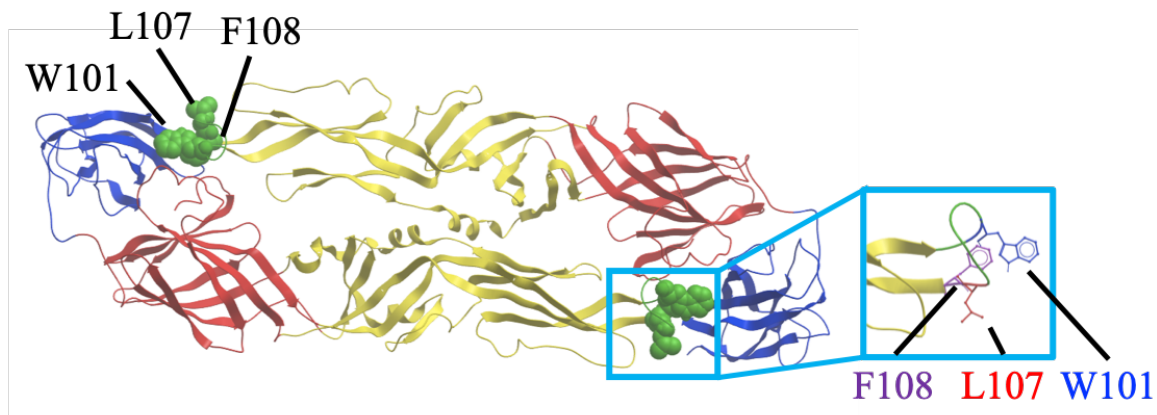

745 **Figure 2. Deduced epitope locations on a ribbon diagram of the DENV-2 E protein**

746 The deduced epitope locations were plotted on a DENV-2 E dimer, based on the data provided

747 by the Protein Data Bank accession number 1OAN. DI, DII and DIII are indicated in red, yellow,

748 and blue, respectively. The fusion loop region (98–110) is colored in green. Mutations affecting

749 reactivity with the HuMAbs are shown as green spheres and in the magnified square.

750



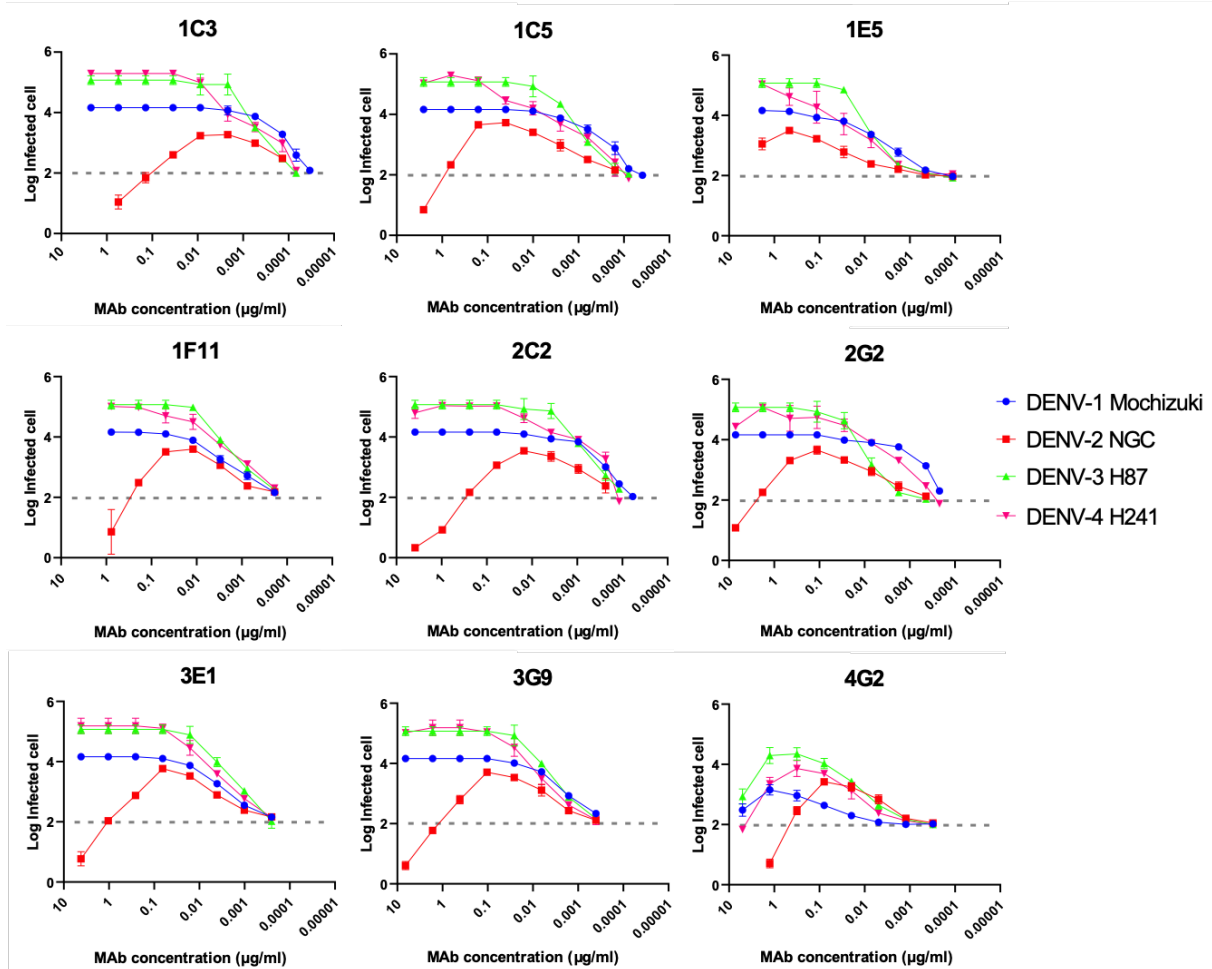

751

752 **Figure 3. ADE activity of the HuMAbs**

753 The DENV-2 NGC strain and K562 cells were used. Dotted lines indicate the baseline of the

754 infected cells in the control (100 infected cells; 2.0). Each data point represents the mean

755 obtained from two independent ADE assays with SDs.

756

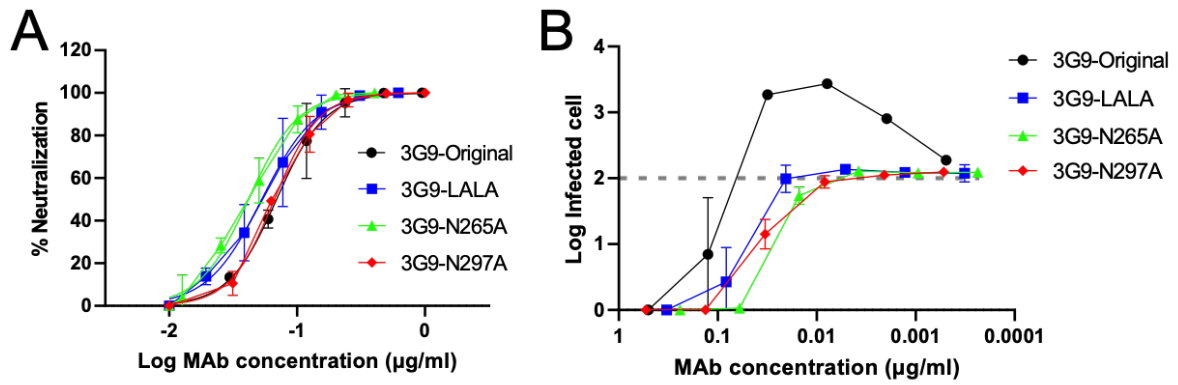

757

758 **Figure 4. Neutralizing and ADE activities of the Fc-modified 3G9**

759 A) Neutralizing activity against DENV-2 NGC strain using Vero cells.

760 B) ADE activity against DENV-2 using K562 cells. Average and SDs of two independent

761 experiments are shown.

762

763

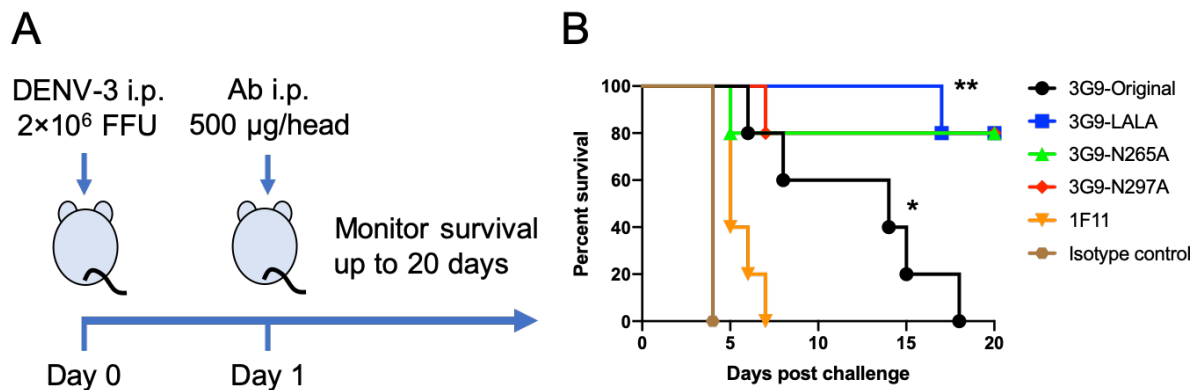

764

765 **Figure 5. *In vivo* efficacy test**

766 A) Scheme of the animal challenge experiment.

767 B) Survival of infected mice after viral challenge. A group of five mice were infected with

768  $2.0 \times 10^6$  FFU of DENV-3. Statistical significance was analyzed using a Kaplan-Meier

769 method. \* $P < 0.01$  for the comparison between isotype control and 3G9-original. \*\* $P$

770  $< 0.05$  for the comparison between 3G9-original and the Fc-modified 3G9. There was

771 no significant difference among the Fc-modified 3G9 ( $P > 0.05$ ).

772

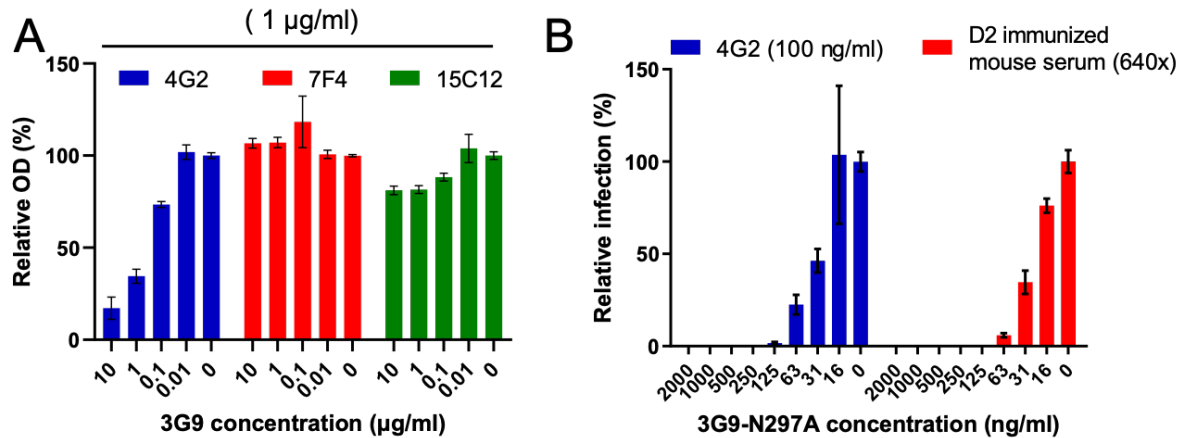

773

774 **Figure 6. Competition ELISA and ADE assay**

775 A) Competition ELISA. Mouse monoclonal antibodies 4G2, 7F4, or 15C12 at 1 µg/ml were  
776 mixed with serially diluted 3G9 and incubated in a DENV-coated ELISA plate. The OD  
777 relative to that of the no competition well (without 3G9) is shown with SDs of triplicate  
778 experiments.

779 B) Competition ADE. 100 ng/ml of 4G2 and 1:640 diluted mouse serum, which showed  
780 the peak level of enhancement, were mixed with DENV-2 NGC and serially diluted  
781 3G9-N297A. The number of infected cells relative to that of the no competition wells  
782 is shown with SDs of triplicate experiments.

783
